# Supplementary material for: Effect of microsolvation on the non-radiative decay of the eumelanin monomer
Source: Royal Society of Chemistry journal article supplement (doi:10.1039/c9cp05166j), 2019-01-01
Supplement: c9cp05166j1.pdf [file c9cp05166j1.pdf]

Supporting Information: Effect of microsolvation  
on the non-radiative decay of eumelanin monomer

Paulami Ghosh and Debashree Ghosh\*

**S1 Optimized ground state of gas phase DHI  
and the mono-hydrated species of DHI**

**S1.1 Optimized ground state geometry at (12o,10e) SA-  
CASSCF/6-311++g(d,p) level of theory**

|   |               |               |              |
|---|---------------|---------------|--------------|
| C | 0.5398418239  | 1.4590480814  | 0.0000000000 |
| C | -0.6920240928 | 0.7894290274  | 0.0000000000 |
| C | -0.7807795430 | -0.6085472932 | 0.0000000000 |
| C | 0.4014282579  | -1.3725481500 | 0.0000000000 |
| C | 1.6158778061  | -0.7157485491 | 0.0000000000 |
| C | 1.6902638125  | 0.6929326031  | 0.0000000000 |
| C | -2.1866842352 | -0.9394361834 | 0.0000000000 |
| C | -2.8654114749 | 0.2386513882  | 0.0000000000 |
| N | -1.9711322823 | 1.2927062712  | 0.0000000000 |
| O | 2.8245860334  | -1.3536267515 | 0.0000000000 |
| O | 2.8929696395  | 1.3084981618  | 0.0000000000 |
| H | -2.6221156100 | -1.9175963240 | 0.0000000000 |
| H | -3.9203729094 | 0.4183904932  | 0.0000000000 |
| H | 0.6180610767  | 2.5306661922  | 0.0000000000 |
| H | 0.3669807643  | -2.4489287539 | 0.0000000000 |
| H | -2.2154709936 | 2.2518594524  | 0.0000000000 |
| H | 3.5815943911  | 0.6651962961  | 0.0000000000 |
| H | 2.7205125357  | -2.2878289617 | 0.0000000000 |

**S1.2 Optimized ground state geometry of conformer D-  
O1 at (14o,14e)/6-311++g(d,p) level of theory**

|   |               |               |              |
|---|---------------|---------------|--------------|
| C | -0.9781395630 | -1.6398767354 | 0.0000000000 |
| C | -1.6670637706 | -0.4185733624 | 0.0000000000 |
| C | -0.9865756396 | 0.8302439573  | 0.0000000000 |
| C | 0.4223009877  | 0.8408494541  | 0.0000000000 |
| C | 1.0966642943  | -0.3625520943 | 0.0000000000 |
| C | 0.4022969705  | -1.5954719030 | 0.0000000000 |

|   |               |               |               |
|---|---------------|---------------|---------------|
| C | -2.0048185254 | 1.8495947661  | 0.0000000000  |
| C | -3.2078163246 | 1.2096970954  | 0.0000000000  |
| N | -3.0120839920 | -0.1564993767 | 0.0000000000  |
| O | 2.4548494772  | -0.4775136667 | 0.0000000000  |
| O | 1.0997515195  | -2.7528304634 | 0.0000000000  |
| H | -1.8592068228 | 2.9105087048  | 0.0000000000  |
| H | -4.1980158183 | 1.6162473873  | 0.0000000000  |
| H | -1.4776862898 | -2.5915704360 | 0.0000000000  |
| H | 0.9755710237  | 1.7640361838  | 0.0000000000  |
| H | -3.7324968035 | -0.8362641991 | 0.0000000000  |
| H | 2.0233179902  | -2.5604676521 | 0.0000000000  |
| H | 2.8845783499  | 0.3651414162  | 0.0000000000  |
| O | 3.8590951886  | 2.1044544944  | 0.0000000000  |
| H | 4.3322055590  | 2.4118014048  | 0.7562603146  |
| H | 4.3322055590  | 2.4118014048  | -0.7562603146 |

### S1.3 Optimized ground state geometry of conformer D-O2 at (14o,14e)/6-311++g(d,p) level of theory

|   |               |               |               |
|---|---------------|---------------|---------------|
| C | -0.3976557173 | -1.3568904273 | 0.0000000000  |
| C | -1.5970472704 | -0.6400326289 | 0.0000000000  |
| C | -1.6291569226 | 0.7654211985  | 0.0000000000  |
| C | -0.4092692711 | 1.4697220079  | 0.0000000000  |
| C | 0.7770913117  | 0.7664192785  | 0.0000000000  |
| C | 0.7939552371  | -0.6465511616 | 0.0000000000  |
| C | -3.0134619827 | 1.1546149420  | 0.0000000000  |
| C | -3.7459793969 | 0.0005924727  | 0.0000000000  |
| N | -2.8963831131 | -1.0861027505 | 0.0000000000  |
| O | 2.0025063725  | 1.3860750958  | 0.0000000000  |
| O | 1.9465596369  | -1.3513407391 | 0.0000000000  |
| H | -3.4095572955 | 2.1494298888  | 0.0000000000  |
| H | -4.8072110238 | -0.1359246541 | 0.0000000000  |
| H | -0.3643699353 | -2.4309423546 | 0.0000000000  |
| H | -0.3958016175 | 2.5471412031  | 0.0000000000  |
| H | -3.1806934997 | -2.0347910641 | 0.0000000000  |
| H | 2.7272833511  | -0.7824347591 | 0.0000000000  |
| H | 1.8925841601  | 2.3196413641  | 0.0000000000  |
| O | 4.7544756885  | -0.1318983810 | 0.0000000000  |
| H | 4.7277199740  | 0.4365121244  | 0.7508744192  |
| H | 4.7277199740  | 0.4365121244  | -0.7508744192 |

### S1.4 Optimized ground state geometry of conformer D-N1 at (14o,14e)/6-311++g(d,p) level of theory

|   |               |               |              |
|---|---------------|---------------|--------------|
| C | 0.1618260872  | -1.0931787173 | 0.0000000000 |
| C | -0.5879324269 | 0.0916553167  | 0.0000000000 |

|   |               |               |               |
|---|---------------|---------------|---------------|
| C | 0.0319327461  | 1.3754563561  | 0.0000000000  |
| C | 1.4380519658  | 1.4513895828  | 0.0000000000  |
| C | 2.1674183999  | 0.2814190604  | 0.0000000000  |
| C | 1.5388141790  | -0.9843923116 | 0.0000000000  |
| C | -1.0339962540 | 2.3396953916  | 0.0000000000  |
| C | -2.2024086453 | 1.6333586015  | 0.0000000000  |
| N | -1.9407805998 | 0.2830175582  | 0.0000000000  |
| O | 3.5370243487  | 0.2385816016  | 0.0000000000  |
| O | 2.2910310225  | -2.1095475450 | 0.0000000000  |
| H | -0.9446049778 | 3.4067690408  | 0.0000000000  |
| H | -3.2117945931 | 1.9894799137  | 0.0000000000  |
| H | -0.2934596410 | -2.0663882444 | 0.0000000000  |
| H | 1.9434583099  | 2.4030106172  | 0.0000000000  |
| H | -2.6266222125 | -0.4373493311 | 0.0000000000  |
| H | 3.2048780317  | -1.8783999145 | 0.0000000000  |
| H | 3.9057443741  | 1.1030670532  | 0.0000000000  |
| O | -3.9593039730 | -2.0771423761 | 0.0000000000  |
| H | -4.2189825907 | -2.5759194919 | 0.7561497498  |
| H | -4.2189825907 | -2.5759194919 | -0.7561497498 |

## S2 Orbitals used in active space based methods in case of D-O1 microsolvated species

### S2.1 CASSCF natural orbitals used in (14o,14e) active space for the calculation of VEEs

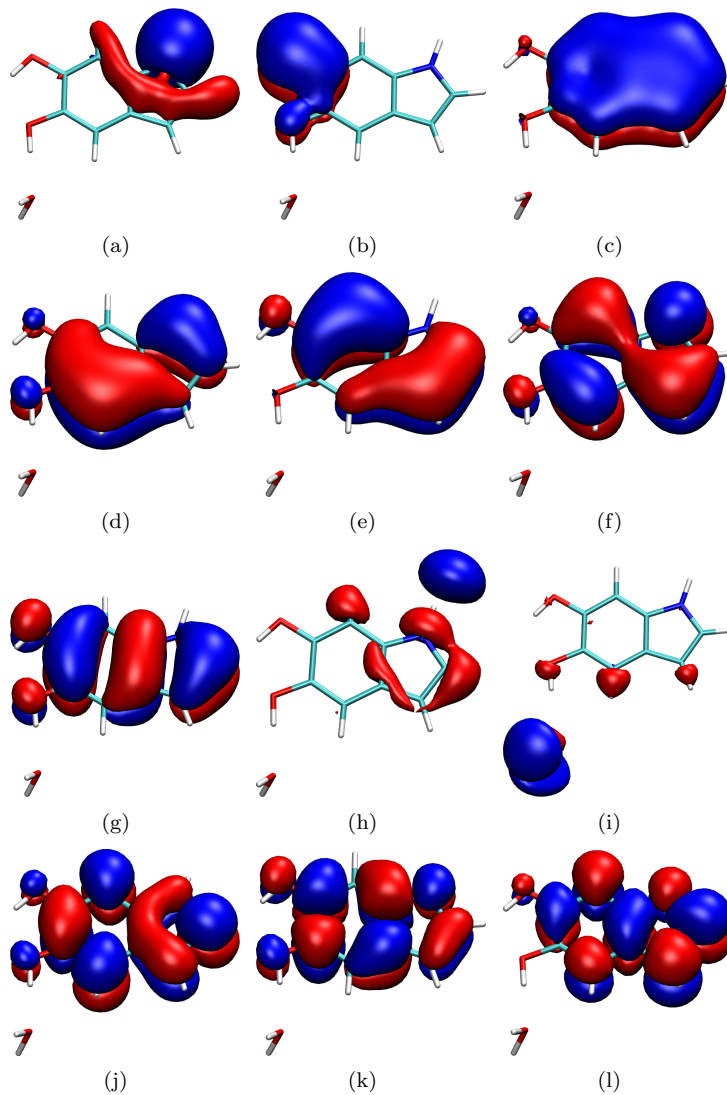

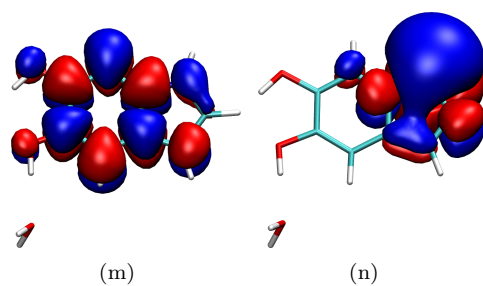

Figure S1: CASSCF natural orbitals involved in  $(14o,14e)/6-311++g(d,p)$  active space for the calculation of VEEs of all conformations of mono-hydrated DHI

### S2.2 CASSCF natural orbitals used in $(4o,2e)$ active space for MECF search

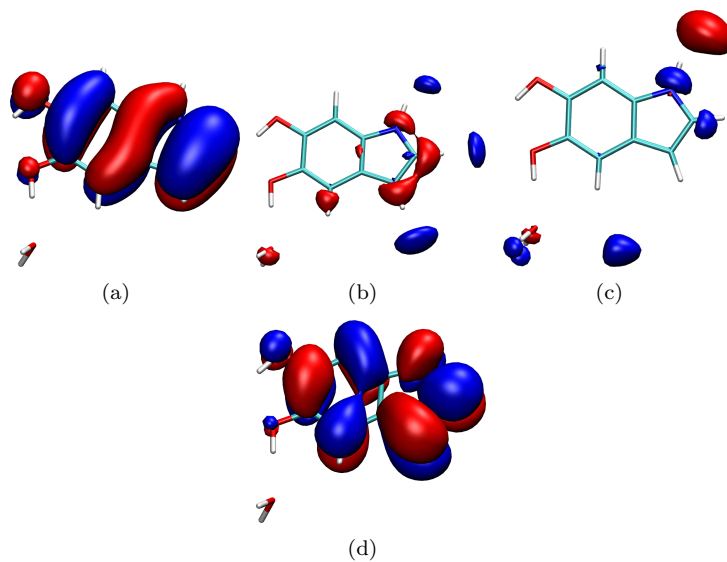

Figure S2: CASSCF natural orbitals used in  $(4o,2e)$  active space for MECF search of D-O1 microsolvated species

### S3 SA-CASPT2 potential energy surfaces (PESs) of DHI in gas phase

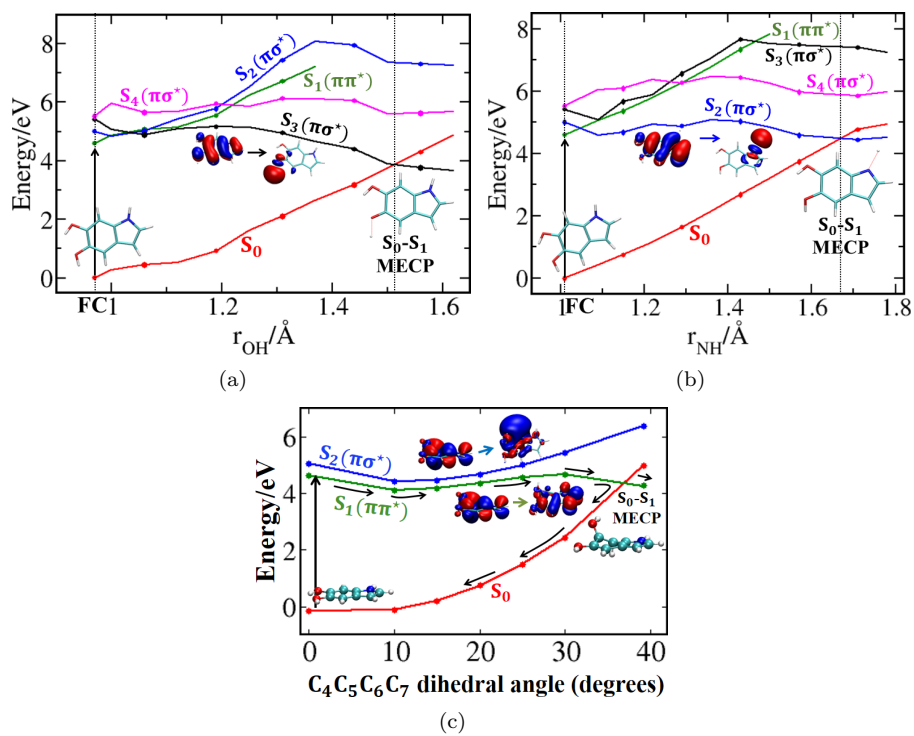

Figure S3: (a) SA-CASPT2 PES of isolated DHI along  $r_{O_5H}$  elongation (b) SA-CASPT2 PES of DHI along  $r_{N_1H}$  elongation. (c) SA-CASPT2 PES of isolated DHI along six membered ring puckering

## S4 SA-CASSCF PESs of D-O1 microsolvated species

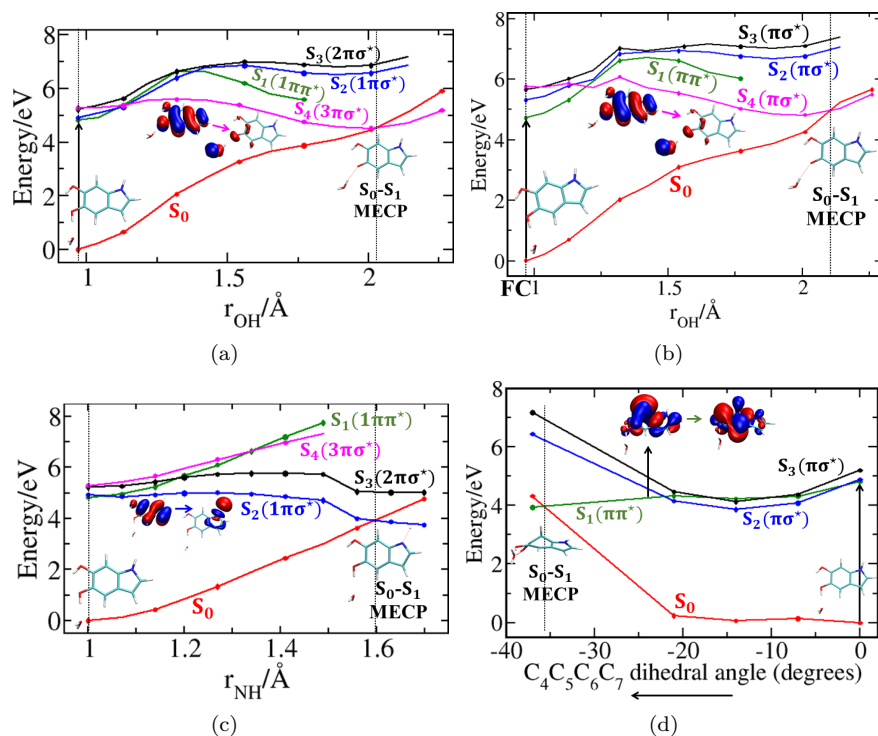

Figure S4: (a) SA-CASSCF PES of D-O1 along  $r_{O_5H}$  elongation. (b) MS-CASPT2 PES of D-O1 along  $r_{O_5H}$  elongation. (c) SA-CASSCF PES of D-O1 along  $r_{N_1H}$  elongation. (d) SA-CASSCF PES of D-O1 along six member ring pucker.

## S5 SA-CASSCF PESs of D-N1 microsolvated species

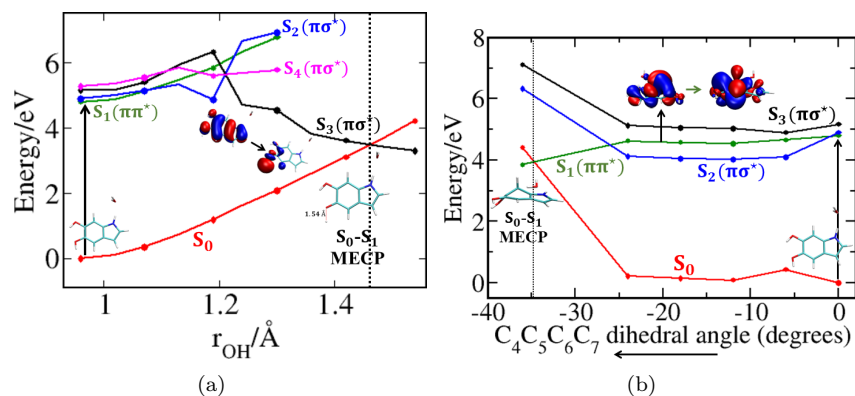

Figure S5: (a) SA-CASSCF PES of D-N1 along  $r_{O_5H}$  elongation. (b) SA-CASSCF PES of D-N1 along six member ring pucker.

**S6 Topological parameters around the MECPs  
of isolated DHI and microsolvated species of  
DHI**

| Molecule | mode                     | $\sigma_x$ | $\sigma_y$ | $d_{gh}$ | $\Delta_{gh}$ |
|----------|--------------------------|------------|------------|----------|---------------|
| DHI      | OH MECP                  | 0.02045    | -1.40292   | 0.19324  | -0.64809      |
|          | NH MECP                  | -0.87175   | -0.12929   | 0.24844  | 0.89056       |
|          | six member ring puckered | 0.0562     | 0.44572    | 0.16662  | 0.61658       |
| D-O1     | OH MECP                  | 1.42065    | -0.02887   | 0.20173  | 0.99563       |
|          | NH MECP                  | -0.96429   | 0.40707    | 0.20508  | 0.77298       |
|          | six member ring puckered | -0.43724   | -0.02419   | 0.16782  | 0.68522       |
| D-O2     | OH MECP                  | -1.28578   | -0.71556   | 0.18712  | 0.49274       |
| D-N1     | OH MECP                  | -0.74631   | 0.00167    | 0.37003  | 0.97398       |
|          | six member ring puckered | -0.36624   | -0.28054   | 0.16288  | 0.60084       |



## S7 $g$ and $h$ vectors around CIs of gas phase DHI and micro-solvated DHI species

### S7.1 $g$ and $h$ vectors around CIs of gas phase DHI

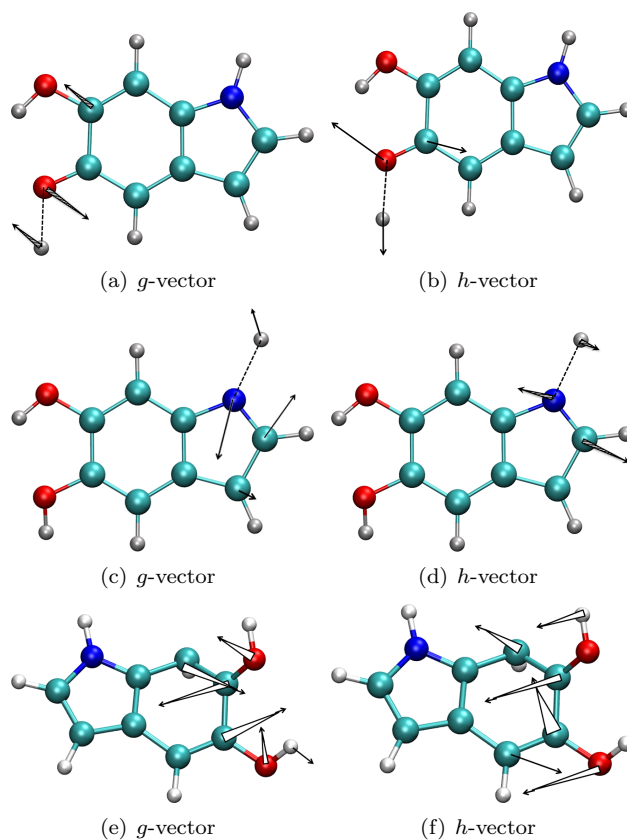

Figure S6: (a)  $g$ -vector around  $S_0$ - $S_3$   $r_{O_5H}$  elongated CI of DHI. (b)  $h$ -vector around  $S_0$ - $S_3$   $r_{O_5H}$  elongated CI of DHI. (c)  $g$ -vector around  $S_0$ - $S_2$   $r_{N_1H}$  elongated CI of DHI. (d)  $h$ -vector around  $S_0$ - $S_2$   $r_{N_1H}$  elongated CI of DHI. (e)  $g$ -vector around  $S_0$ - $S_1$  nonplanar CI of DHI. (f)  $h$ -vector around  $S_0$ - $S_1$  nonplanar CI of DHI.

### S7.2 $g$ and $h$ vectors around CIs of D-O1

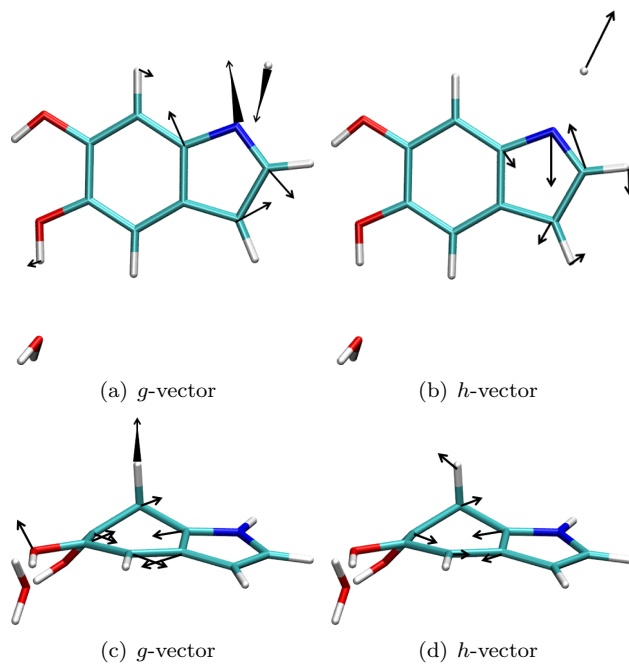

Figure S7: (a)  $g$ -vector around  $S_0$ - $S_2$   $r_{N_1H}$  elongated CI of D-O1. (b)  $h$ -vector around  $S_0$ - $S_2$   $r_{N_1H}$  elongated CI of D-O1. (c)  $g$ -vector around  $S_0$ - $S_1$  nonplanar CI of D-O1. (d)  $h$ -vector around  $S_0$ - $S_1$  nonplanar CI of D-O1.

### S7.3 $g$ and $h$ vectors around CIs of gas phase D-O2

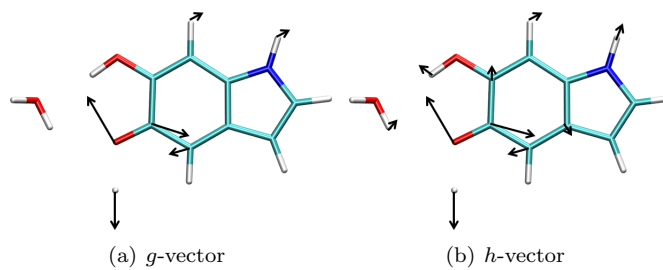

Figure S8: (a)  $g$ -vector around  $S_0$ - $S_2$   $r_{O_5H}$  elongated CI of D-O2. (b)  $h$ -vector around  $S_0$ - $S_2$   $r_{O_5H}$  elongated CI of D-O2.

## S7.4 $g$ and $h$ vectors around CIs of gas phase D-N1

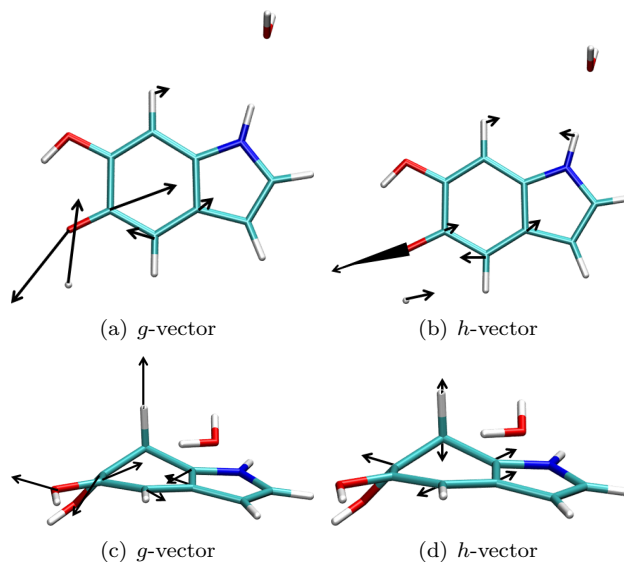

Figure S9: (a)  $g$ -vector around  $S_0$ - $S_3$   $r_{O_5H}$  elongated CI of D-N1. (b)  $h$ -vector around  $S_0$ - $S_3$   $r_{O_5H}$  elongated CI of D-N1. (c)  $g$ -vector around  $S_0$ - $S_1$  nonplanar CI of D-N1. (d)  $h$ -vector around  $S_0$ - $S_1$  nonplanar CI of D-N1.

## S8 Excited state optimized geometry of D-O1

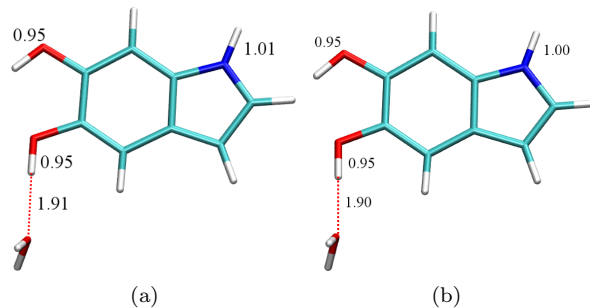

Figure S10: Optically active ( $\pi\pi^*$ ) excited state optimized geometry at  $7^\circ$   $C_4$ - $C_5$ - $C_6$ - $C_7$  dihedral angle: (a) (14o,14e) CASSCF/6-311++g(d,p) (b) TDDFT/6-311++g(d,p)

## S8.1 VEEs at excited state optimized geometries of D-O1

Table S1: VEEs in eV at  $\pi\pi^*$  excited state optimized geometries of D-O1 at CASPT2/6-311++g(d,p) level of theory

| Geometry         | $S_1 (\pi\sigma^*)$ | $S_2 (\pi\pi^*)$ |
|------------------|---------------------|------------------|
| TDDFT optimized  | 3.62                | 4.38             |
| CASSCF optimized | 3.60                | 4.37             |

## S9 Vertical ionization energies (VIEs) of DHI, the microsolvated species of DHI, 4-hydroxybenzothiazole (4-HBT) and 4-HBT+water

Table S2: The VIEs in eV of DHI and the microsolvated species of DHI with EOM-IP-CCSD/6-311++g(d,p) level of theory.

|      |        |             |             |
|------|--------|-------------|-------------|
|      | Number | Orbital     | EOM-IP-CCSD |
| DHI  | 1st IP | HOMO (39)   | 7.31        |
|      | 2nd IP | HOMO-1 (38) | 7.64        |
|      | 3rd IP | HOMO-2 (37) | 9.63        |
|      | 4th IP | HOMO-3 (36) | 10.56       |
|      | 5th IP | HOMO-4 (35) | 11.85       |
|      | Number | Orbital     | EOM-IP-CCSD |
| D-O1 | 1st IP | HOMO (44)   | 6.97        |
|      | 2nd IP | HOMO-1 (43) | 7.29        |
|      | 3rd IP | HOMO-2 (42) | 9.36        |
|      | 4th IP | HOMO-3 (41) | 10.18       |
|      | 5th IP | HOMO-4 (40) | 11.43       |
|      | Number | Orbital     | EOM-IP-CCSD |
| D-O2 | 1st IP | HOMO (44)   | 7.31        |
|      | 2nd IP | HOMO-1 (43) | 7.74        |
|      | 3rd IP | HOMO-2 (42) | 9.67        |
|      | 4th IP | HOMO-3 (41) | 10.61       |
|      | 5th IP | HOMO-4 (40) | 11.48       |
|      | Number | Orbital     | EOM-IP-CCSD |
| D-N1 | 1st IP | HOMO (44)   | 7.01        |
|      | 2nd IP | HOMO-1 (43) | 7.32        |
|      | 3rd IP | HOMO-2 (42) | 9.35        |
|      | 4th IP | HOMO-3 (41) | 10.26       |
|      | 5th IP | HOMO-4 (40) | 11.52       |

|             | Number | Orbital     | EOM-IP-CCSD |
|-------------|--------|-------------|-------------|
| 4-HBT       | 1st IP | HOMO (39)   | 8.12        |
|             | 2nd IP | HOMO-1 (38) | 8.92        |
|             | 3rd IP | HOMO-2 (37) | 10.38       |
|             | 4th IP | HOMO-3 (36) | 10.53       |
|             | 5th IP | HOMO-4 (35) | 11.66       |
|             | Number | Orbital     | EOM-IP-CCSD |
| 4-HBT+water | 1st IP | HOMO (44)   | 7.96        |
|             | 2nd IP | HOMO-1 (43) | 9.01        |
|             | 3rd IP | HOMO-2 (42) | 10.39       |
|             | 4th IP | HOMO-3 (41) | 10.61       |
|             | 5th IP | HOMO-5 (39) | 11.40       |
